# Supplementary material for: Bubble-assisted HIFU ablation enabled by calcium peroxide
Source: Royal Society of Chemistry journal article supplement (doi:10.1039/d2tb00587e), 2022-01-01
Supplement: d2tb00587e1.pdf [file d2tb00587e1.pdf]

## **Bubble-Assisted HIFU Ablation Enabled by Calcium Peroxide**

*Chunmei Wang<sup>ab</sup>, Zhifang Li<sup>b\*</sup> and Jianwen Bai<sup>ab\*</sup>*

<sup>a</sup>Shanghai East Hospital, Nanjing Medical University, Nanjing 211166, Jiangsu province, People's Republic of China.

<sup>b</sup>Department of Emergency Medicine and Critical Care, Shanghai East Hospital, Tongji University, Shanghai 200120, People's Republic of China.

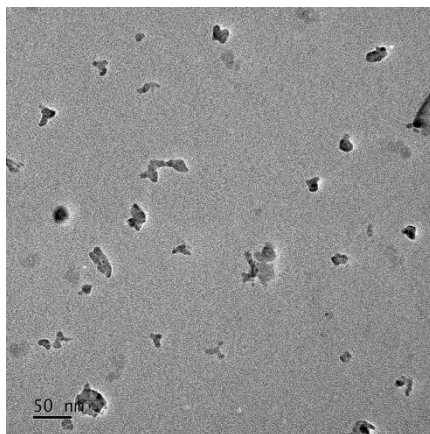

Figure S1. TEM image of  $\text{CaO}_2$  NPs.

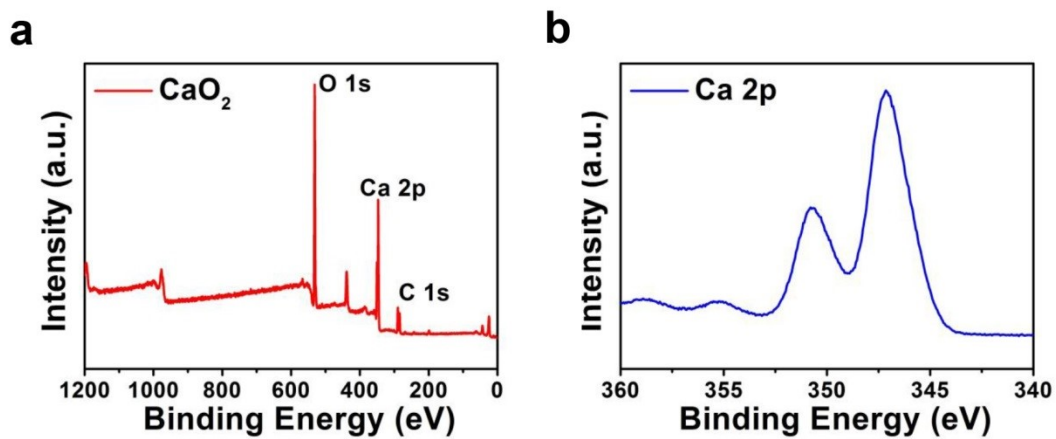

Figure S2. The XPS survey scan (a) and Ca 2p scan (b) of  $\text{CaO}_2$  NP.

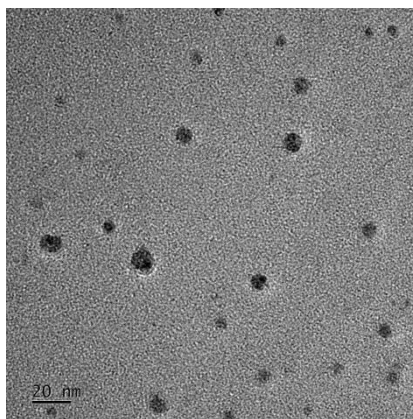

Figure S3. TEM image of  $\text{CaO}_2@\text{SiO}_2$  NPs.

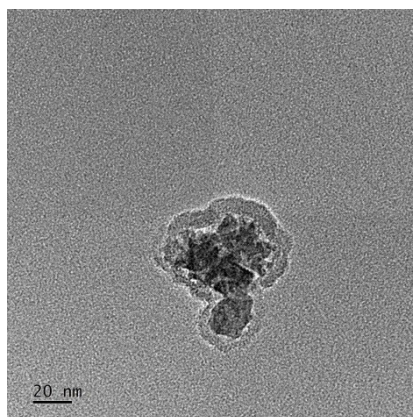

Figure S4. HRTEM image of  $\text{CaO}_2@\text{SiO}_2$  NPs.

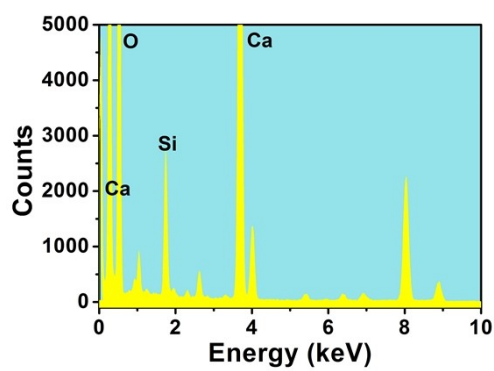

Figure S5. X-ray energy dispersive spectroscopy (EDS) of  $\text{CaO}_2@\text{SiO}_2$  NPs.

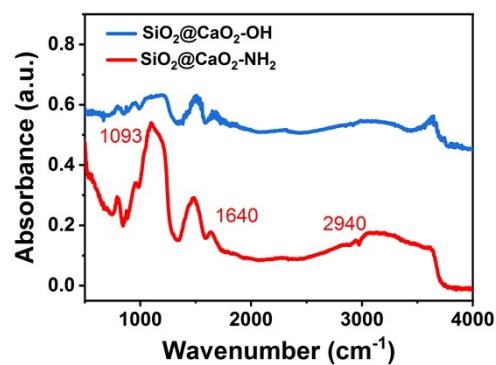

Figure S6. FTIR spectra of CaO<sub>2</sub>@SiO<sub>2</sub> NPs before and after APTES modification.

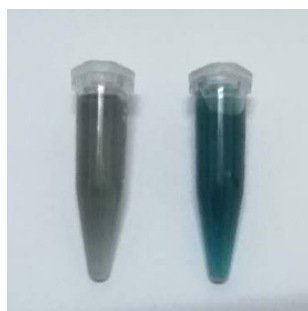

Figure S7. Digital photos of TMB before and after adding CaO<sub>2</sub>@SiO<sub>2</sub> NPs in the presence of Fe<sup>2+</sup>.

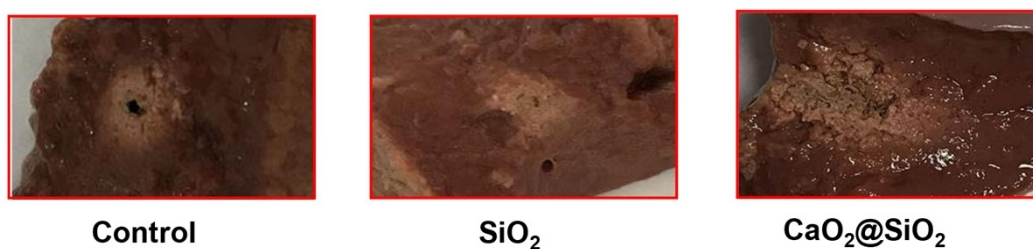

Figure S8. The digital photos of ablated liver in different treatment groups including PBS, SiO<sub>2</sub> and CaO<sub>2</sub>@SiO<sub>2</sub> after HIFU treatment.

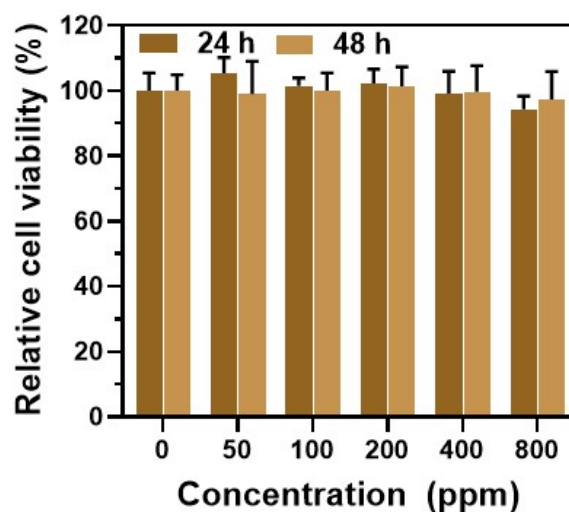

**Figure S9.** Relative viabilities of 4T1 cells after incubation with  $\text{CaO}_2@\text{SiO}_2$  NPs at elevated concentrations (0, 50, 100, 200, 400 and 800  $\mu\text{g mL}^{-1}$ ) for 24 h and 48 h.

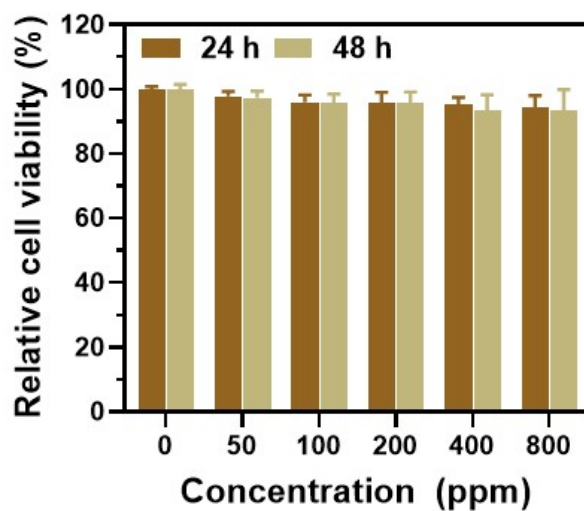

**Figure S10.** Relative viabilities of LLC cells after incubation with  $\text{CaO}_2@\text{SiO}_2$  NPs at elevated concentrations (0, 50, 100, 200, 400 and 800  $\mu\text{g mL}^{-1}$ ) for 24 h and 48 h.

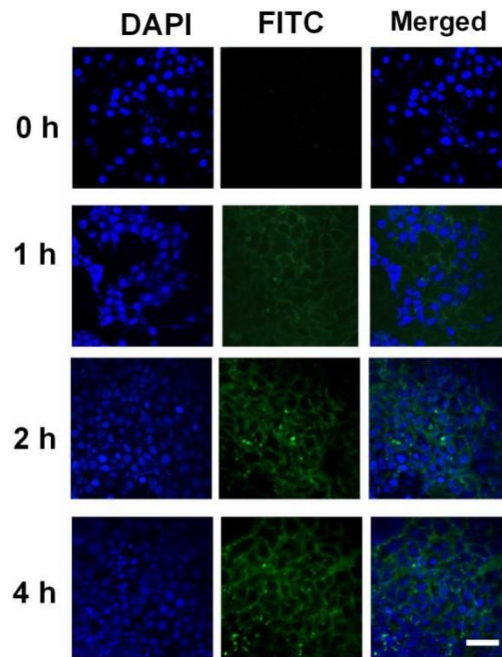

**Figure S11.** CLSM images of 4T1 cells after co-incubation with FITC-labeled  $\text{CaO}_2@\text{SiO}_2$  NPs for 0, 1, 2 and 4 h. All the scale bars are 50  $\mu\text{m}$ .

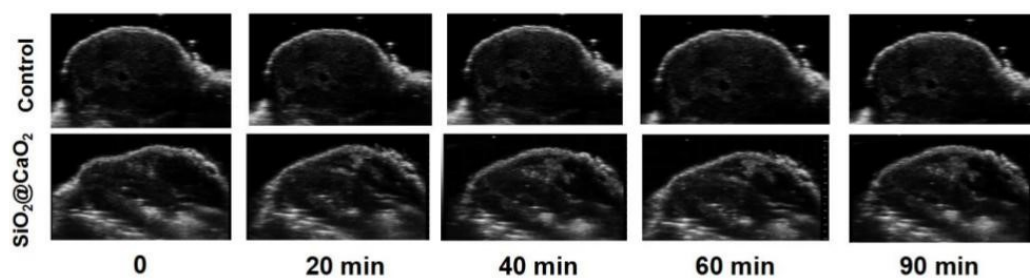

**Figure S12.** Real time B-mode US imaging of 4T1 tumor-bearing mice after *i.t.* administration of  $\text{CaO}_2@\text{SiO}_2$  NPs for prolonged time intervals.

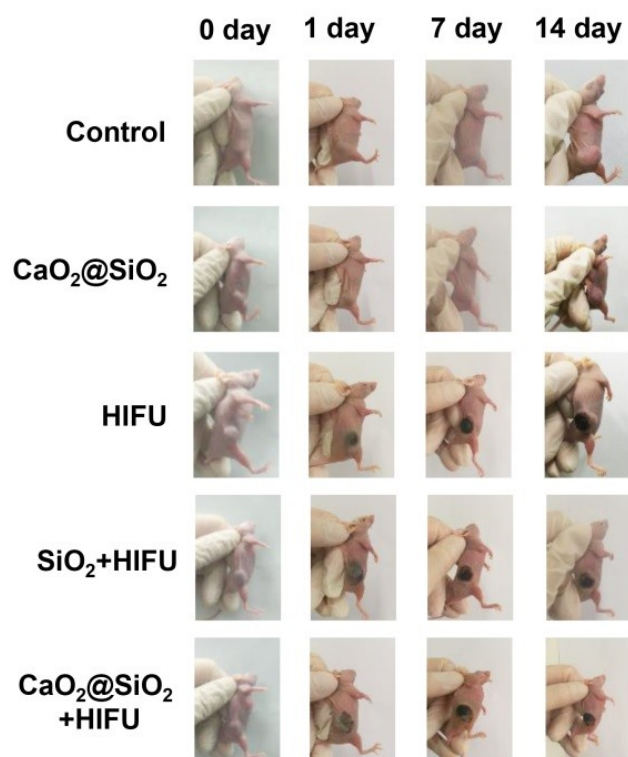

**Figure S13.** Digital images of 4T1 tumors from each group after different treatments for two weeks.

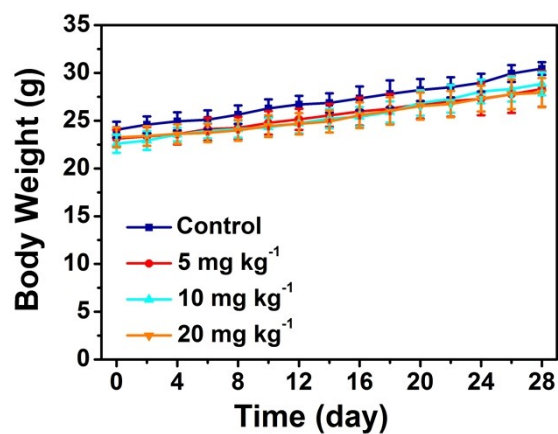

**Figure S14.** Time-dependent body-weight changing curves of Kunming mice during one-month's feeding period.

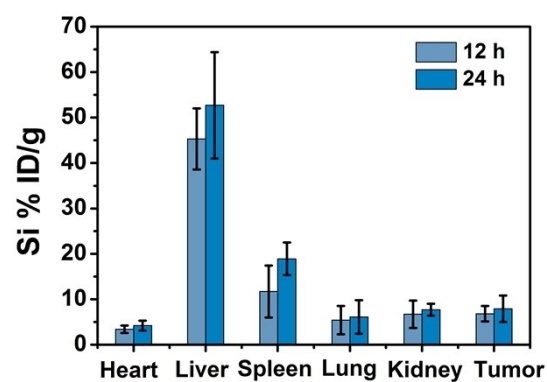

**Figure S15.** Biodistribution test after the intravenous administration of  $\text{CaO}_2@\text{SiO}_2$  NPs into LCC tumor-bearing mice for 12 and 24 h (n = 3).

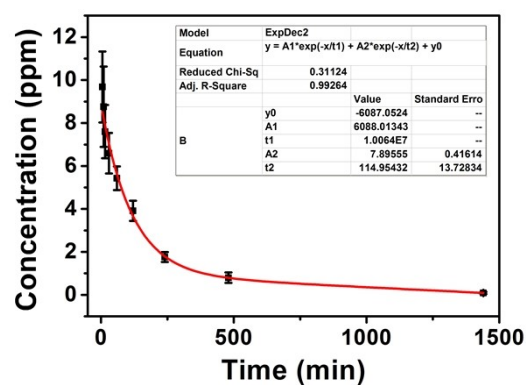

**Figure S16.** Blood circulation curve of intravenously injected  $\text{CaO}_2@\text{SiO}_2$  NPs (n = 3).
